# Supplementary material for: Changes in mRNA abundance drive shuttling of RNA binding proteins, linking cytoplasmic RNA degradation to transcription
Source: eLife journal article supplement (doi:10.7554/elife.37663), 2018-10-03

Figure 5-figure supplement 2

A. PABPC knockdown RNAPII ChIP

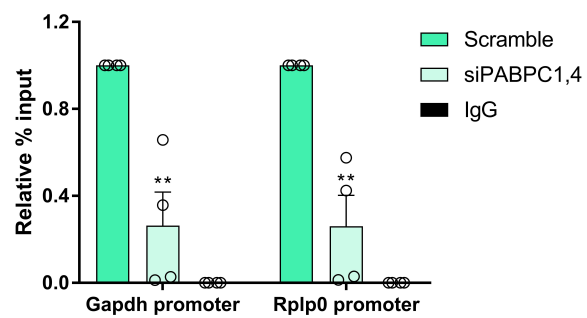

B. LARP4 knockdown RNAPII ChIP

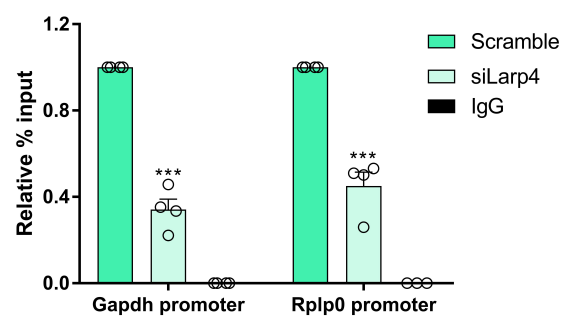

C. CHD3 knockdown RNAPII ChIP

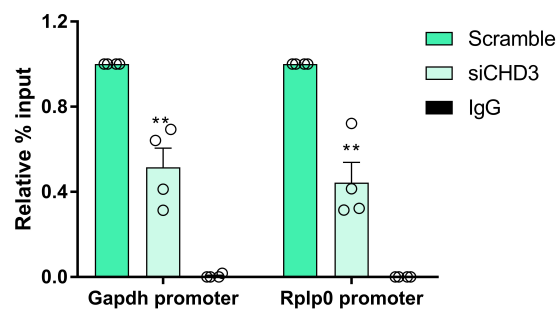

D. MSI1 knockdown RNAPII ChIP

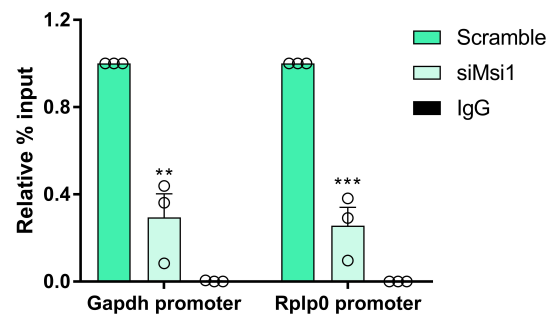

E. TRIM32 knockdown RNAPII ChIP

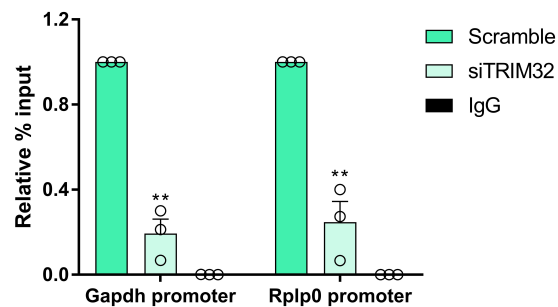

Supplement: supp [file elife-37663-supp-v1.zip]
