# Supplementary material for: Changes in mRNA abundance drive shuttling of RNA binding proteins, linking cytoplasmic RNA degradation to transcription
Source: eLife journal article supplement (doi:10.7554/elife.37663), 2018-10-03

Figure 5-supplement 1

A. CHD3 knockdown RNAPII ChIP

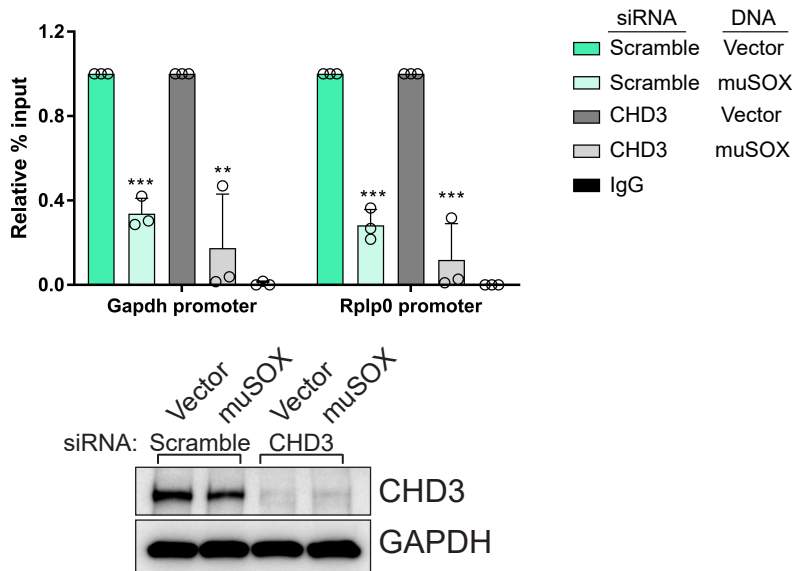

B. MSI1 knockdown RNAPII ChIP

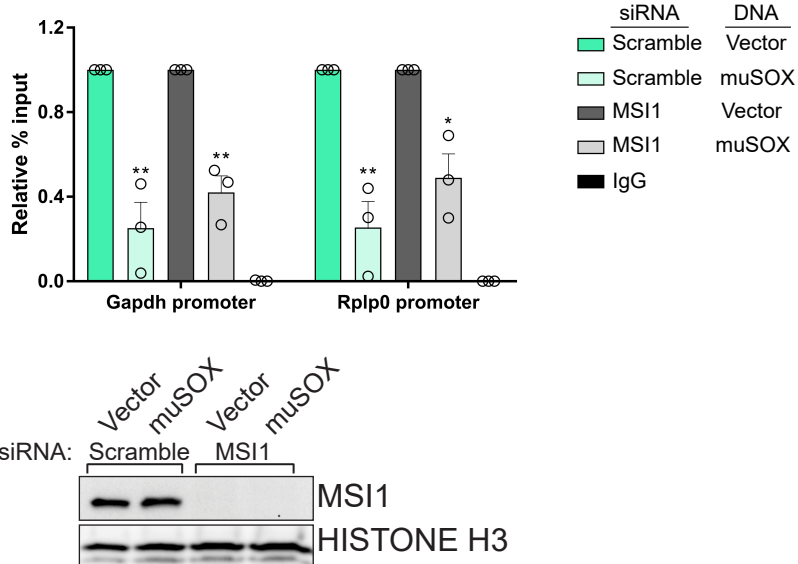

C. TRIM32 knockdown RNAPII ChIP

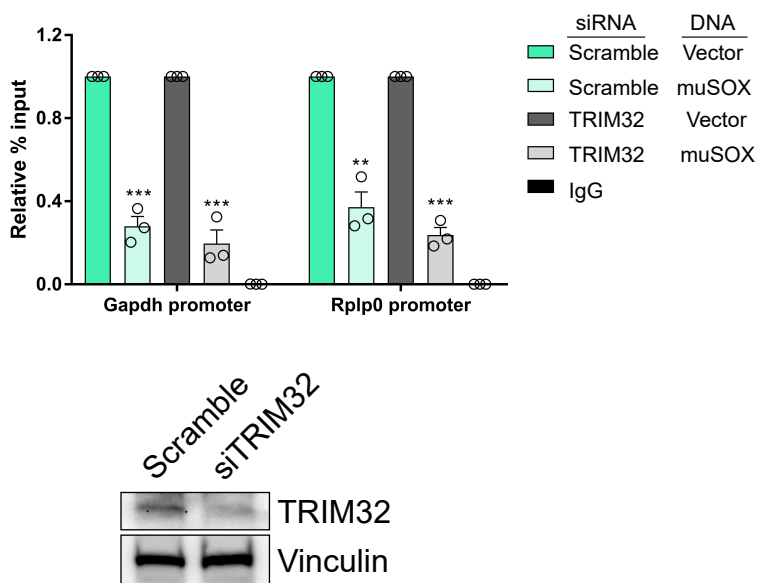

Supplement: supp [file elife-37663-supp-v1.zip]
