# Supplementary figures and images for: Changes in mRNA abundance drive shuttling of RNA binding proteins, linking cytoplasmic RNA degradation to transcription
Source: eLife journal article supplement (doi:10.7554/elife.37663), 2018-10-03

Figure 2-figure supplement 1

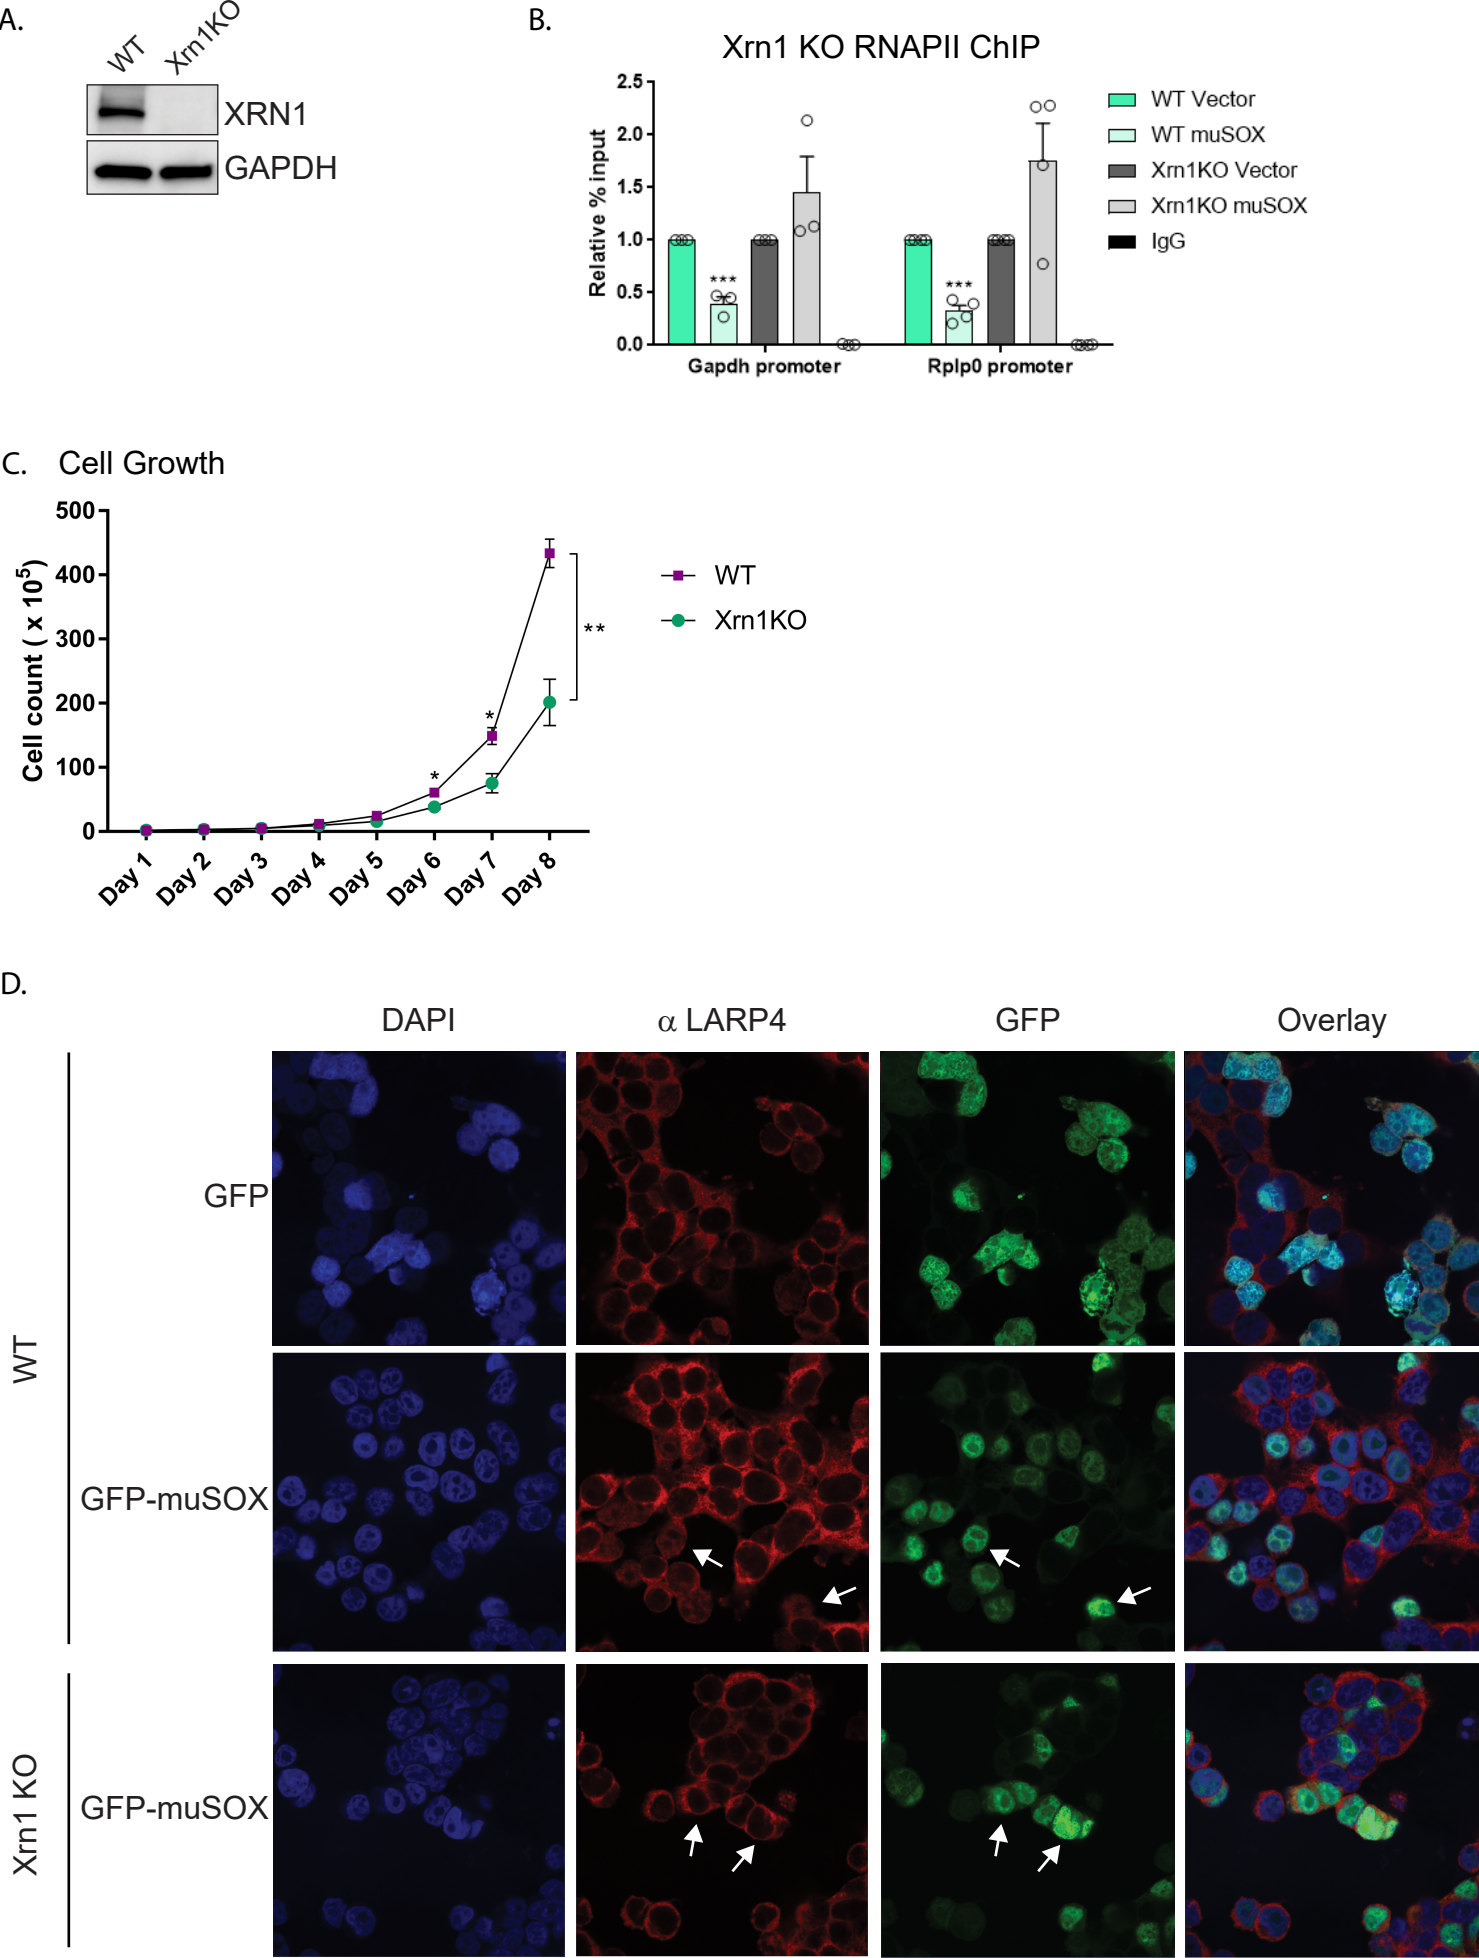

Supplement: supp [file elife-37663-supp-v1.zip]

Figure 1-figure supplement 1

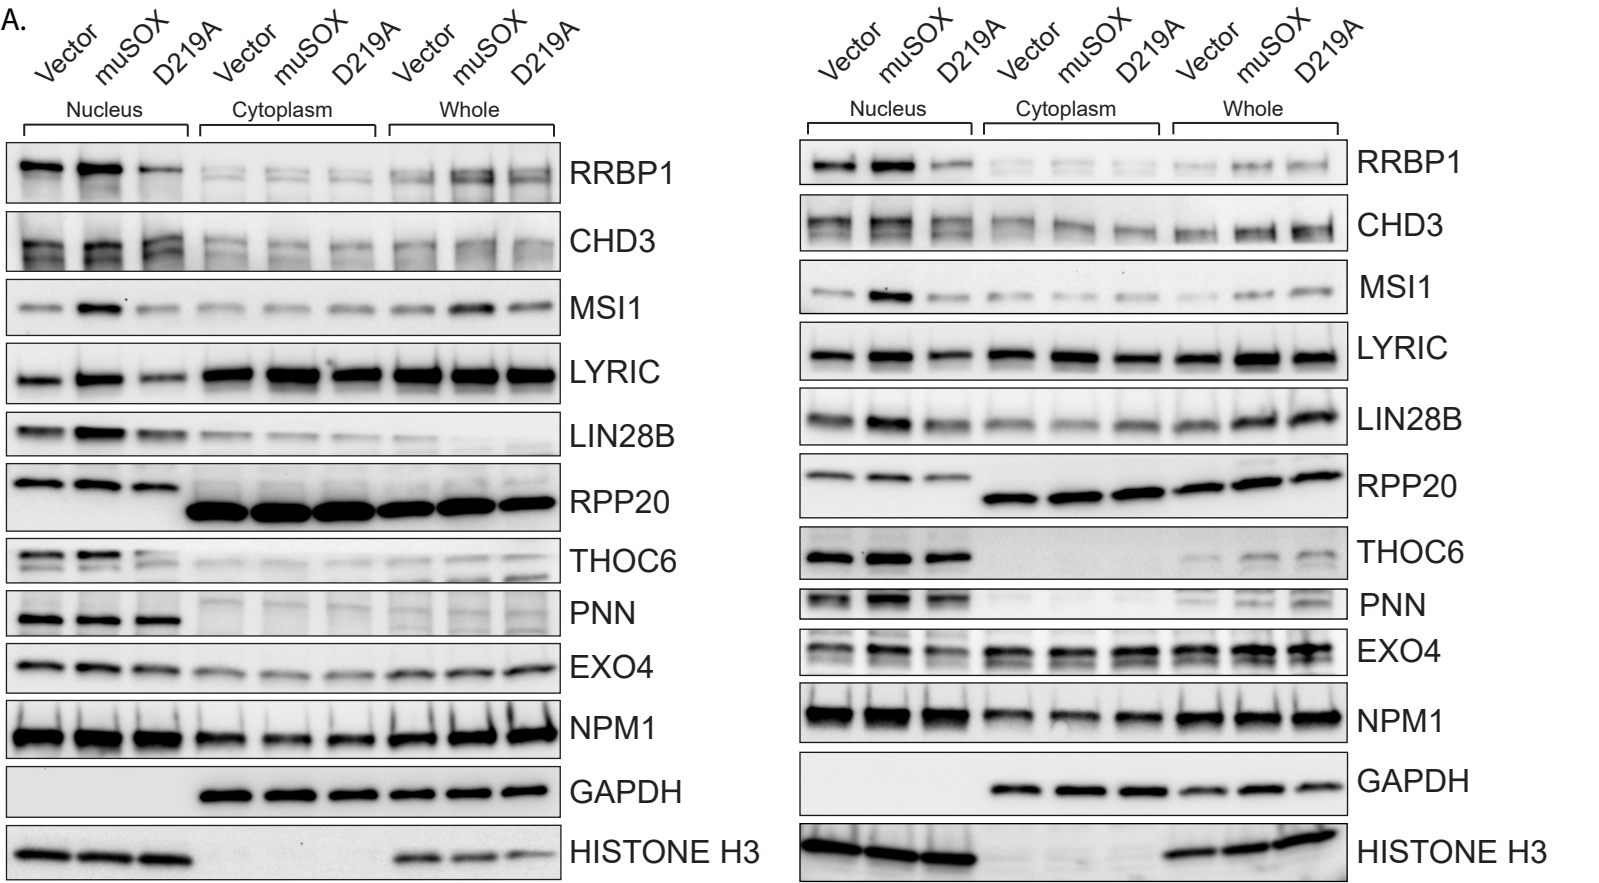

**B. Poly(U) binding proteins**

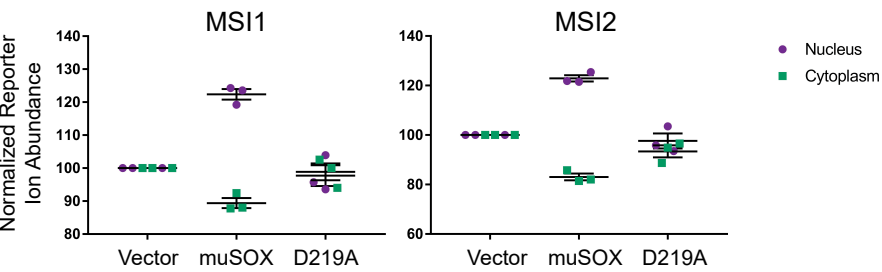

**C. mRNA 3'UTR binding proteins**

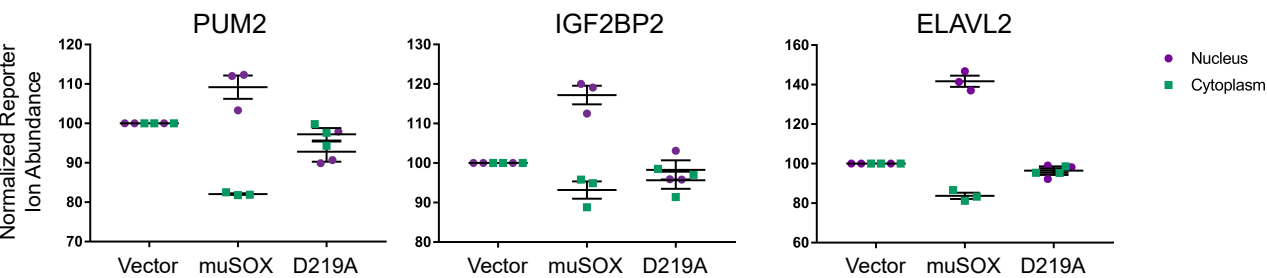

Supplement: supp [file elife-37663-supp-v1.zip]

Figure 3-figure supplement 1

A. OST complex

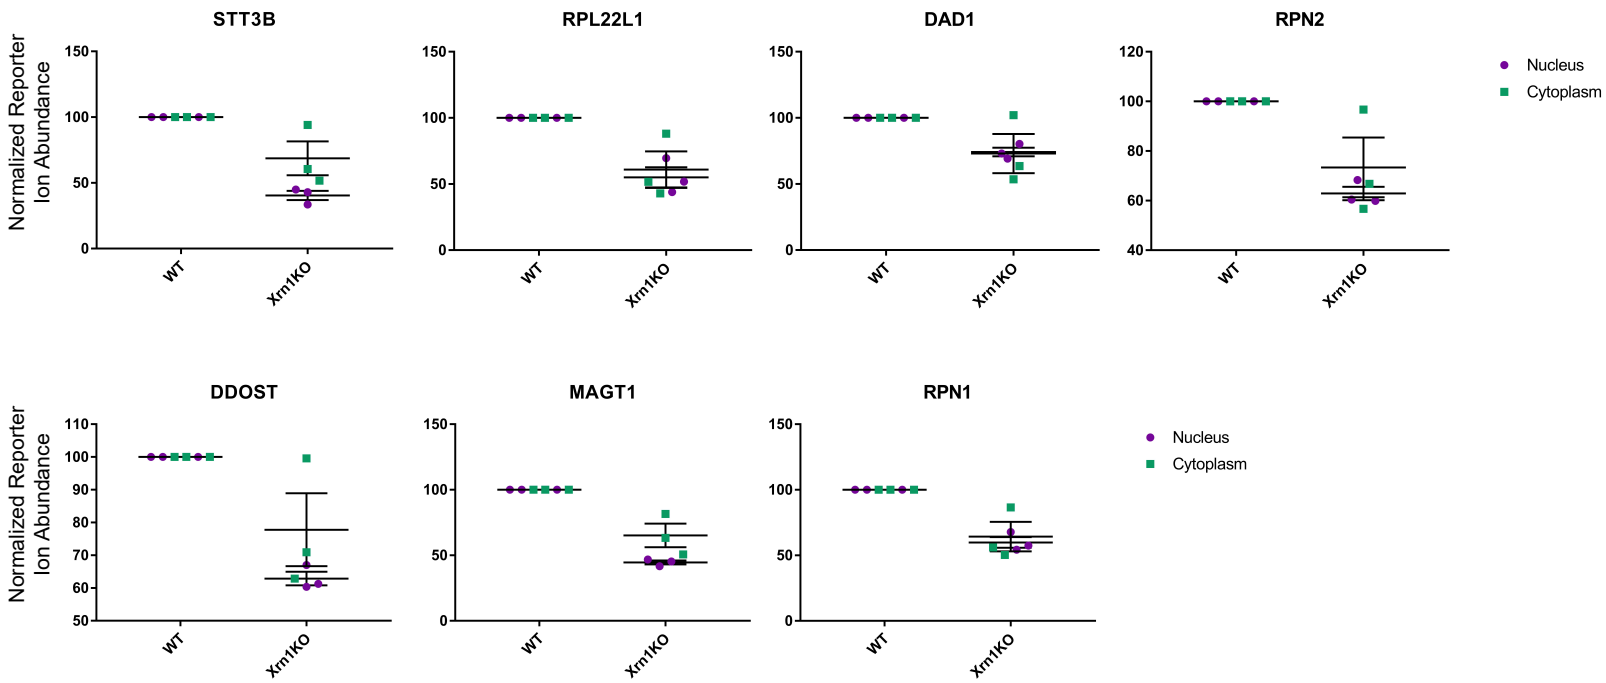

B. Gene Expression

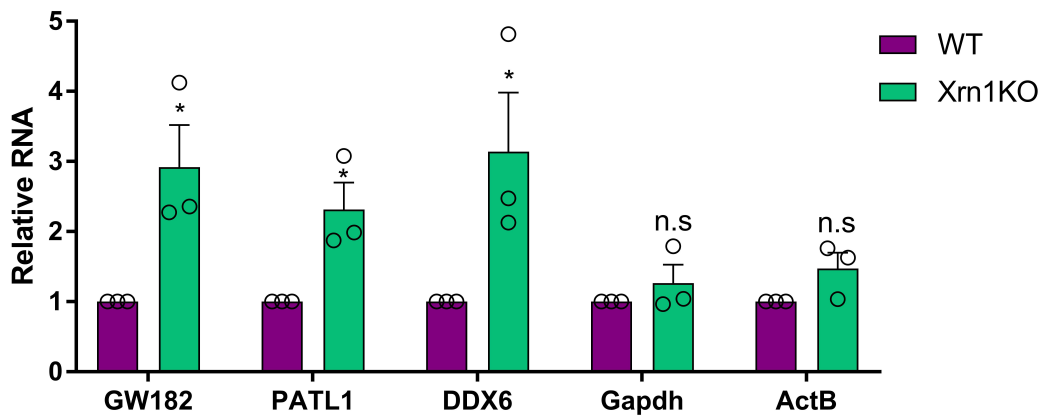

Supplement: supp [file elife-37663-supp-v1.zip]

Figure 6-figure supplement 1

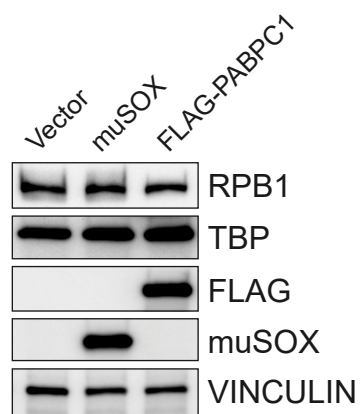

Supplement: supp [file elife-37663-supp-v1.zip]
